# Supplementary material for: Haplotype Analysis Sheds Light on the Genetic Evolution of the Powdery Mildew Resistance Locus Pm60 in Triticum Species
Source: Pathogens. 2023 Feb 2;12(2):241. doi: 10.3390/pathogens12020241 (PMC9964976; doi:10.3390/pathogens12020241)
Supplement: Supplementary file 1 [file pathogens-12-00241-s001.zip › Huang et al. Supplementary Tables S1-S4.xlsx]

## Sheet: Table S1
Table S1. A list of wheat germplasm tested for the presence of Pm60 alleles.
Accessions	Species	Genome	Pm60	Haplotypes
CItr 17677	Triticum timopheevii subsp. armeniacum	AAGG	-
CItr 17678	Triticum timopheevii subsp. armeniacum	AAGG	-
CItr 17679	Triticum timopheevii subsp. armeniacum	AAGG	-
PI 352265	Triticum timopheevii subsp. armeniacum	AAGG	-
PI 355452	Triticum timopheevii subsp. armeniacum	AAGG	-
PI 361859	Triticum timopheevii subsp. armeniacum	AAGG	+	HapIII
PI 418579	Triticum timopheevii subsp. armeniacum	AAGG	-
PI 427300	Triticum timopheevii subsp. armeniacum	AAGG	-
PI 427302	Triticum timopheevii subsp. armeniacum	AAGG	-
PI 427303	Triticum timopheevii subsp. armeniacum	AAGG	-
PI 266850	Triticum timopheevii.subsp. timopheevii	AAGG	-
CItr 15205	Triticum timopheevii.subsp. timopheevii	AAGG	-
AS2268	Triticum turgidum L. subsp. carthlicum	AABB	-
CItr 7665	Triticum turgidum L. subsp. carthlicum	AABB	+	HapII
PI 190949	Triticum turgidum L. subsp. carthlicum	AABB	+	HapII
PI 470729	Triticum turgidum L. subsp. carthlicum	AABB	-
PI 532512	Triticum turgidum L. subsp. carthlicum	AABB	-
CItr 4013	Triticum turgidum L. subsp. dicoccon	AABB	-
CItr7685	Triticum turgidum L. subsp. dicoccon	AABB	+	HapI
CItr7686	Triticum turgidum L. subsp. dicoccon	AABB	+	HapI
CItr 7687	Triticum turgidum L. subsp. dicoccon	AABB	-
CItr 7779	Triticum turgidum L. subsp. dicoccon	AABB	-
PI 56234	Triticum turgidum L. subsp. dicoccon	AABB	-
PI 57536	Triticum turgidum L. subsp. dicoccon	AABB	-
PI 58788	Triticum turgidum L. subsp. dicoccon	AABB	-
PI 94620	Triticum turgidum L. subsp. dicoccon	AABB	-
PI 94614	Triticum turgidum L. subsp. dicoccon	AABB	-
PI 94627	Triticum turgidum L. subsp. dicoccon	AABB	-
PI 94650	Triticum turgidum L. subsp. dicoccon	AABB	-
PI 94655	Triticum turgidum L. subsp. dicoccon	AABB	-
PI 94666	Triticum turgidum L. subsp. dicoccon	AABB	-
PI 94670	Triticum turgidum L. subsp. dicoccon	AABB	-
PI 94675	Triticum turgidum L. subsp. dicoccon	AABB	-
PI 113961	Triticum turgidum L. subsp. dicoccon	AABB	-
PI 113963	Triticum turgidum L. subsp. dicoccon	AABB	-
PI 154582	Triticum turgidum L. subsp. dicoccon	AABB	-
PI 191781	Triticum turgidum L. subsp. dicoccon	AABB	+	HapI
PI 221401	Triticum turgidum L. subsp. dicoccon	AABB	-
PI 221403	Triticum turgidum L. subsp. dicoccon	AABB	-
PI 264964	Triticum turgidum L. subsp. dicoccon	AABB	-
PI 306533	Triticum turgidum L. subsp. dicoccon	AABB	-
PI 323435	Triticum turgidum L. subsp. dicoccon	AABB	-
PI 350001	Triticum turgidum L. subsp. dicoccon	AABB	-
PI 352331	Triticum turgidum L. subsp. dicoccon	AABB	-
PI 352335	Triticum turgidum L. subsp. dicoccon	AABB	+	HapI
PI 352347	Triticum turgidum L. subsp. dicoccon	AABB	-
PI 352358	Triticum turgidum L. subsp. dicoccon	AABB	-
PI 352359	Triticum turgidum L. subsp. dicoccon	AABB	-
PI 352367	Triticum turgidum L. subsp. dicoccon	AABB	-
PI 352369	Triticum turgidum L. subsp. dicoccon	AABB	-
PI 355465	Triticum turgidum L. subsp. dicoccon	AABB	+	HapI
PI 355476	Triticum turgidum L. subsp. dicoccon	AABB	-
PI 355477	Triticum turgidum L. subsp. dicoccon	AABB	-
PI 355490	Triticum turgidum L. subsp. dicoccon	AABB	-
PI 355497	Triticum turgidum L. subsp. dicoccon	AABB	-
PI 355507	Triticum turgidum L. subsp. dicoccon	AABB	-
PI 355527	Triticum turgidum L. subsp. dicoccon	AABB	-
PI 361731	Triticum turgidum L. subsp. dicoccon	AABB	-
PI 362699	Triticum turgidum L. subsp. dicoccon	AABB	-
PI 374685	Triticum turgidum L. subsp. dicoccon	AABB	-
PI 377655	Triticum turgidum L. subsp. dicoccon	AABB	-
PI 415152	Triticum turgidum L. subsp. dicoccon	AABB	+	HapI
PI 434998	Triticum turgidum L. subsp. dicoccon	AABB	-
PI 428104	Triticum turgidum L. subsp.dicoccoides	AABB	-
PI 466956	Triticum turgidum L. subsp.dicoccoides	AABB	-
PI 466999	Triticum turgidum L. subsp.dicoccoides	AABB	-
PI 467007	Triticum turgidum L. subsp.dicoccoides	AABB	-
PI 467012	Triticum turgidum L. subsp.dicoccoides	AABB	-
PI 470946	Triticum turgidum L. subsp.dicoccoides	AABB	-
PI 470970	Triticum turgidum L. subsp.dicoccoides	AABB	-
PI 470988	Triticum turgidum L. subsp.dicoccoides	AABB	-
PI 471020	Triticum turgidum L. subsp.dicoccoides	AABB	-
PI 471624	Triticum turgidum L. subsp.dicoccoides	AABB	-
PI 471643	Triticum turgidum L. subsp.dicoccoides	AABB	-
PI 471646	Triticum turgidum L. subsp.dicoccoides	AABB	-
PI 471653	Triticum turgidum L. subsp.dicoccoides	AABB	-
PI 471655	Triticum turgidum L. subsp.dicoccoides	AABB	-
PI 471667	Triticum turgidum L. subsp.dicoccoides	AABB	-
PI 471678	Triticum turgidum L. subsp.dicoccoides	AABB	-
PI 471679	Triticum turgidum L. subsp.dicoccoides	AABB	-
PI 471706	Triticum turgidum L. subsp.dicoccoides	AABB	-
PI 471707	Triticum turgidum L. subsp.dicoccoides	AABB	-
PI 471753	Triticum turgidum L. subsp.dicoccoides	AABB	-
PI 471761	Triticum turgidum L. subsp.dicoccoides	AABB	-
PI 471771	Triticum turgidum L. subsp.dicoccoides	AABB	-
PI 478718	Triticum turgidum L. subsp.dicoccoides	AABB	-
PI 478724	Triticum turgidum L. subsp.dicoccoides	AABB	-
PI 478727	Triticum turgidum L. subsp.dicoccoides	AABB	-
PI478735	Triticum turgidum L. subsp.dicoccoides	AABB	+	MW375699
PI 481482	Triticum turgidum L. subsp.dicoccoides	AABB	-
PI 481504	Triticum turgidum L. subsp.dicoccoides	AABB	-
PI 481508	Triticum turgidum L. subsp.dicoccoides	AABB	-
PI 481515	Triticum turgidum L. subsp.dicoccoides	AABB	+	MW375701
PI 481524	Triticum turgidum L. subsp.dicoccoides	AABB	-
PI 481525	Triticum turgidum L. subsp.dicoccoides	AABB	-
PI 481529	Triticum turgidum L. subsp.dicoccoides	AABB	-
PI 481530	Triticum turgidum L. subsp.dicoccoides	AABB	-
PI 654334	Triticum turgidum L. subsp.dicoccoides	AABB	-
PI 654336	Triticum turgidum L. subsp.dicoccoides	AABB	-
AS2262	Triticum turgidum L. subsp. durum	AABB	+	HapII
AS285	Triticum turgidum L. subsp. durum	AABB	+	HapII
PI 94684	Triticum turgidum L. subsp. durum	AABB	-
PI 107606	Triticum turgidum L. subsp. durum	AABB	+	HapII
PI 192393	Triticum turgidum L. subsp. durum	AABB	-
PI 231310	Triticum turgidum L. subsp. durum	AABB	-
PI 265007	Triticum turgidum L. subsp. durum	AABB	-
PI 274668	Triticum turgidum L. subsp. durum	AABB	-
PI 278598	Triticum turgidum L. subsp. durum	AABB	-
PI 306664	Triticum turgidum L. subsp. durum	AABB	-
PI 316089	Triticum turgidum L. subsp. durum	AABB	-
PI 352439	Triticum turgidum L. subsp. durum	AABB	+	HapII
PI 429317	Triticum turgidum L. subsp. durum	AABB	-
PI 519620	Triticum turgidum L. subsp. durum	AABB	-
PI 349050	Triticum turgidum L. subsp. Palaeocolchicum	AABB	-
PI 330553	Triticum turgidum L. subsp. Palaeocolchicum	AABB	-
PI 349050	Triticum turgidum L. subsp. Palaeocolchicum	AABB	-
PI 418586	Triticum turgidum L. subsp. Palaeocolchicum	AABB	-
CItr 14803	Triticum turgidum L. subsp. Polonicum	AABB	-
PI 190951	Triticum turgidum L. subsp. Polonicum	AABB	-
PI 191903	Triticum turgidum L. subsp. Polonicum	AABB	-
PI 210845	Triticum turgidum L. subsp. Polonicum	AABB	-
PI 278647	Triticum turgidum L. subsp. Polonicum	AABB	-
PI 349052	Triticum turgidum L. subsp. Polonicum	AABB	-
PI 361757	Triticum turgidum L. subsp. Polonicum	AABB	-
CItr 14089	Triticum turgidum L. subsp. turanicum	AABB	+	HapI
CItr 14095	Triticum turgidum L. subsp. turanicum	AABB	-
PI 113392	Triticum turgidum L. subsp. turanicum	AABB	+	HapII
PI 113393	Triticum turgidum L. subsp. turanicum	AABB	+	HapII
PI 115814	Triticum turgidum L. subsp. turanicum	AABB	-
PI 115815	Triticum turgidum L. subsp. turanicum	AABB	-
PI 124494	Triticum turgidum L. subsp. turanicum	AABB	+	HapII
PI 127106	Triticum turgidum L. subsp. turanicum	AABB	-
PI 166308	Triticum turgidum L. subsp. turanicum	AABB	-
PI 184543	Triticum turgidum L. subsp. turanicum	AABB	-
PI 185193	Triticum turgidum L. subsp. turanicum	AABB	-
PI 184526	Triticum turgidum L. subsp. turanicum	AABB	-
PI 184543	Triticum turgidum L. subsp. turanicum	AABB	-
PI 211691	Triticum turgidum L. subsp. turanicum	AABB	-
PI 211708	Triticum turgidum L. subsp. turanicum	AABB	-
PI 254201	Triticum turgidum L. subsp. turanicum	AABB	+	HapII
PI 256034	Triticum turgidum L. subsp. turanicum	AABB	-
PI 286069	Triticum turgidum L. subsp. turanicum	AABB	-
PI 306665	Triticum turgidum L. subsp. turanicum	AABB	-
PI 349055	Triticum turgidum L. subsp. turanicum	AABB	-
PI 352514	Triticum turgidum L. subsp. turanicum	AABB	-
PI 525355	Triticum turgidum L. subsp. turanicum	AABB	-
PI 532136	Triticum turgidum L. subsp. turanicum	AABB	-
AS313	Triticum turgidum L. subsp. turgidum	AABB	-
AS2236-1	Triticum turgidum L. subsp. turgidum	AABB	-
AS2236-2	Triticum turgidum L. subsp. turgidum	AABB	-
AS2238	Triticum turgidum L. subsp. turgidum	AABB	-
AS2239	Triticum turgidum L. subsp. turgidum	AABB	-
AS2240	Triticum turgidum L. subsp. turgidum	AABB	-
AS2255	Triticum turgidum L. subsp. turgidum	AABB	-
AS2285	Triticum turgidum L. subsp. turgidum	AABB	-
AS2295	Triticum turgidum L. subsp. turgidum	AABB	-
AS2291	Triticum turgidum L. subsp. turgidum	AABB	-
AS2296	Triticum turgidum L. subsp. turgidum	AABB	-
AS2298	Triticum turgidum L. subsp. turgidum	AABB	-
AS2299	Triticum turgidum L. subsp. turgidum	AABB	-
AS2305	Triticum turgidum L. subsp. turgidum	AABB	-
AS2308	Triticum turgidum L. subsp. turgidum	AABB	-
AS2310	Triticum turgidum L. subsp. turgidum	AABB	-
AS2312	Triticum turgidum L. subsp. turgidum	AABB	-
AS2313	Triticum turgidum L. subsp. turgidum	AABB	-
AS2326	Triticum turgidum L. subsp. turgidum	AABB	-
AS2334	Triticum turgidum L. subsp. turgidum	AABB	-
AS2351	Triticum turgidum L. subsp. turgidum	AABB	-
AS2378	Triticum turgidum L. subsp. turgidum	AABB	-
AS2380	Triticum turgidum L. subsp. turgidum	AABB	-
AS2381	Triticum turgidum L. subsp. turgidum	AABB	-
AS2382	Triticum turgidum L. subsp. turgidum	AABB	-
PI 94755	Triticum aestivum L.subsp. aestivum	AABBDD	-
PI 173493	Triticum aestivum L.subsp. aestivum	AABBDD	-
PI 182471	Triticum aestivum L.subsp. aestivum	AABBDD	-
CItr 13959	Triticum aestivum L. subsp. spelta (L.) Thell.	AABBDD	-
CItr 13967	Triticum aestivum L. subsp. spelta (L.) Thell.	AABBDD	-
CItr 14138	Triticum aestivum L. subsp. spelta (L.) Thell.	AABBDD	-
CItr 15071	Triticum aestivum L. subsp. spelta (L.) Thell.	AABBDD	-
CItr 17764	Triticum aestivum L. subsp. spelta (L.) Thell.	AABBDD	-
PI 15865	Triticum aestivum L. subsp. spelta (L.) Thell.	AABBDD	-
PI 57394	Triticum aestivum L. subsp. spelta (L.) Thell.	AABBDD	-
PI 168680	Triticum aestivum L. subsp. spelta (L.) Thell.	AABBDD	-
PI 168682	Triticum aestivum L. subsp. spelta (L.) Thell.	AABBDD	-
PI 168683	Triticum aestivum L. subsp. spelta (L.) Thell.	AABBDD	-
PI 168684	Triticum aestivum L. subsp. spelta (L.) Thell.	AABBDD	-
PI 190960	Triticum aestivum L. subsp. spelta (L.) Thell.	AABBDD	-
PI 190962	Triticum aestivum L. subsp. spelta (L.) Thell.	AABBDD	-
PI 190963	Triticum aestivum L. subsp. spelta (L.) Thell.	AABBDD	-
PI 191100	Triticum aestivum L. subsp. spelta (L.) Thell.	AABBDD	-
CItr 8610	Triticum aestivum subsp. sphaerococcum	AABBDD	-
PI 40941	Triticum aestivum subsp. sphaerococcum	AABBDD	-
PI 40943	Triticum aestivum subsp. sphaerococcum	AABBDD	-
PI 40944	Triticum aestivum subsp. sphaerococcum	AABBDD	-
PI 42013	Triticum aestivum subsp. sphaerococcum	AABBDD	-
PI 70711	Triticum aestivum subsp. sphaerococcum	AABBDD	-
PI 83402	Triticum aestivum subsp. sphaerococcum	AABBDD	-
PI 115818	Triticum aestivum subsp. sphaerococcum	AABBDD	-
PI 168685	Triticum aestivum subsp. sphaerococcum	AABBDD	-
PI 182118	Triticum aestivum subsp. sphaerococcum	AABBDD	-
PI 190982	Triticum aestivum subsp. sphaerococcum	AABBDD	-
PI 191301	Triticum aestivum subsp. sphaerococcum	AABBDD	-
PI 56213	Triticum aestivum L. subsp. compactum (Host) Mac Key	AABBDD	-
PI 129523	Triticum aestivum L. subsp. compactum (Host) Mac Key	AABBDD	-
PI 129528	Triticum aestivum L. subsp. compactum (Host) Mac Key	AABBDD	-
PI 159101	Triticum aestivum L. subsp. compactum (Host) Mac Key	AABBDD	-
PI 186391	Triticum aestivum L. subsp. compactum (Host) Mac Key	AABBDD	-
PI 191874	Triticum aestivum L. subsp. compactum (Host) Mac Key	AABBDD	-
PI 211701	Triticum aestivum L. subsp. compactum (Host) Mac Key	AABBDD	-
PI 25970	Triticum aestivum L. subsp. compactum (Host) Mac Key	AABBDD	-
PI 262665	Triticum aestivum L. subsp. compactum (Host) Mac Key	AABBDD	-
PI 164160	Triticum aestivum L. subsp. compactum (Host) Mac Key	AABBDD	-
PI 140191	Triticum aestivum L. subsp. macha (Dekapr. & Menabde) Mac Key	AABBDD	-
PI 272554	Triticum aestivum L. subsp. macha (Dekapr. & Menabde) Mac Key	AABBDD	-
PI 272555	Triticum aestivum L. subsp. macha (Dekapr. & Menabde) Mac Key	AABBDD	-
PI 290507	Triticum aestivum L. subsp. macha (Dekapr. & Menabde) Mac Key	AABBDD	-
PI 323436	Triticum aestivum L. subsp. macha (Dekapr. & Menabde) Mac Key	AABBDD	-
PI 352466	Triticum aestivum L. subsp. macha (Dekapr. & Menabde) Mac Key	AABBDD	-
PI 355508	Triticum aestivum L. subsp. macha (Dekapr. & Menabde) Mac Key	AABBDD	-
PI 355509	Triticum aestivum L. subsp. macha (Dekapr. & Menabde) Mac Key	AABBDD	-
PI 355511	Triticum aestivum L. subsp. macha (Dekapr. & Menabde) Mac Key	AABBDD	-
PI 355512	Triticum aestivum L. subsp. macha (Dekapr. & Menabde) Mac Key	AABBDD	-
PI 355513	Triticum aestivum L. subsp. macha (Dekapr. & Menabde) Mac Key	AABBDD	-
PI 355514	Triticum aestivum L. subsp. macha (Dekapr. & Menabde) Mac Key	AABBDD	-
PI 326319	Triticum vavilovii Jakubz.	AABBDD	-
PI 428343	Triticum vavilovii Jakubz.	AABBDD	-
PI296968	Triticum zhukovskyi Menabde & Eritzjan	GGAtAtAmAm	-
PI 341805	Triticum zhukovskyi Menabde & Eritzjan	GGAtAtAmAm	-
PI352553	Triticum zhukovskyi Menabde & Eritzjan	GGAtAtAmAm	-
PI 355706	Triticum zhukovskyi Menabde & Eritzjan	GGAtAtAmAm	-
PI584347	Aegilops sharonensis	SshSsh	-
PI584348	Aegilops sharonensis	SshSsh	-
CIae32	Aegilops sharonensis	SshSsh	-
CIae70	Aegilops bicornis	SbSb	-
CIae47	Aegilops bicornis	SbSb	-
PI599130	Aegilops searsii	SSSS	-
PI599122	Aegilops searsii	SSSS	-
PI599121	Aegilops searsii	SSSS	-

## Sheet: Table S2
Table S2. Primers used in this study.
Primer Name	Primer Sequence （5'-3'）	Purpose	Reference
M-Pm60-S1	F: CTCACAGTTCCACACTGATAT	Screening of the functional Pm60 alleles	Zhao et al. [11]
	R: CTCCATCAATCTCAAGTTCTTCG
Pm60-1	F: AATCCCACCTGCCATAAGC	Amplification and sequencing of the entire Pm60 region	Li et al. [8]
	R: TGAGGAAACACATCGGGAC
Pm60-2J	F: AGGGTTCCCCTCTAGCAG	Amplification and sequencing of the entire Pm60 region	In this study
	R: CCCTCTAGGTGAAGATACTCC
Pm60-3	F: CCAAGCTTGAGTCAAAAGGT	Amplification and sequencing of the entire Pm60 region	Li et al. [8]
	R: GGAAGCAGGCAAAGGATTGA
Pm60-4J	F: ATTCTGCAGGGAACAACATG	Amplification and sequencing of the entire Pm60 region	In this study
	R: GAATTGTGATCCTCGTAGGAA

## Sheet: Table S3
Table S3. Haplotypes of the entire genomic DNA sequence of Pm60 gene identified in the present study.
Haplotypes	Base variation
Positiona	175	535-537	946	1183	1242	1299	1640	1923-1925	2100	2185	2452	3368-3608	3724	3887	4304
TuPm60	G	GCC	C	G	G	A	T	TGT	G	T	T	240bp	G	G	A
HapI	C	/	T	A	A	C	T	TGT	G	A	A	240bp	G	G	G
HapII	C	GCC	C	G	G	C	C	ATA	C	A	A	/	A	A	G
HapIII	C	/	T	A	A	C	C	ATA	C	A	A	/	A	A	G
Codon change	GCC>CCC	GCC>/	CCA>TCA	GAG>AAG	GAG>GAA	TCA>TCC	GTA>GCA	CGTGTC>CGATAC	TTG>TTC	TTG>ATG	TAC>AAC	/	GGA>AGA	CGT>CAT	GAG>GGG
Amino acid change	A59P	A179/	P316S	E395K	No change	No change	V547A	RV642RY	L700F	L729M	Y818N	/	G1242R	R1296H	E1435G
a Nucleotide positions are relative to the start codon of the TuPm60 gene

## Sheet: Table S4
Table S4. List of Pm60 homologs used in phylogenetic analysis.
Description	Max Score	Total Score	Query Cover	E value	Per. Ident	Acc. Len	Chr.	location	Reference Genome
BRADI_1g29658v3	1445	1445	0.56	0	0.7813	3717	1	25223723..25224060	B. distachyon
BRADI_2g38192v3	1727	1727	0.57	0	0.7997	3723	2	38310217..38310554	B. distachyon
TRIUR3_00771	390	390	0.3	3e-111	0.7302	3483	7A	707904852-707908705	T. urartu acc. G1812
TRIUR3_00770	1050	1546	0.69	0	0.7888	3483	7A	707873301-707877179	T. urartu acc. G1812
TRIDC7AG077150.1	1718	2329	0.97	0	0.7657	3789	7A	736593123..736596911	T. dicoccoides acc. Zavitan
TRITD7Bv1G230590.1	1384	1384	0.57	0	0.7753	3099	7B	711598814..711601912	T. durum acc. Svevo
TRITD7Av1G277190.1	1288	1288	0.45	0	0.7915	3387	7A	719042587..719045973	T. durum acc. Svevo
TraesCS7A01G554200.1	595	595	0.24	2e-173	0.7768	1059	7A	726685163..726686221	T. aestivum cv. Chinese Spring
TraesCS7B01G479200.1	6842	7084	1	0	0.9665	4113	7B	733811146..733815258	T. aestivum cv. Chinese Spring
TS01.7B01G0976700.1	2327.6	3140.8	0.99	0	0.7597	3879	7B	592267296-592274159	Ae. speltoides cv.TS01
TH02.7S01G0968600.1	5281.6	6882.8	1	0	0.953	3852	7S	831342353-831349292	Ae. sharonensis cv.TH02
TL05.4S01G0749100.1	5392.5	6808.9	0.98	0	0.9627	3813	4S	756743236-756750142	Aeg. longissima cv.TL05
TE01.7S01G0924600.1	5779.3	7938.2	1	0	0.9618	4113	7S	733298000-733302112	Ae. searsii cv. TE01
